# Supplementary material for: S-nitrosylation triggers ABI5 degradation to promote seed germination and seedling growth
Source: Nat Commun. 2015 Oct 23;6:8669. doi: 10.1038/ncomms9669 (PMC4639896; doi:10.1038/ncomms9669)
Supplement: Supplementary Information — Supplementary Figures 1-12 and Supplementary References [file ncomms9669-s1.pdf]

## Supplementary Information

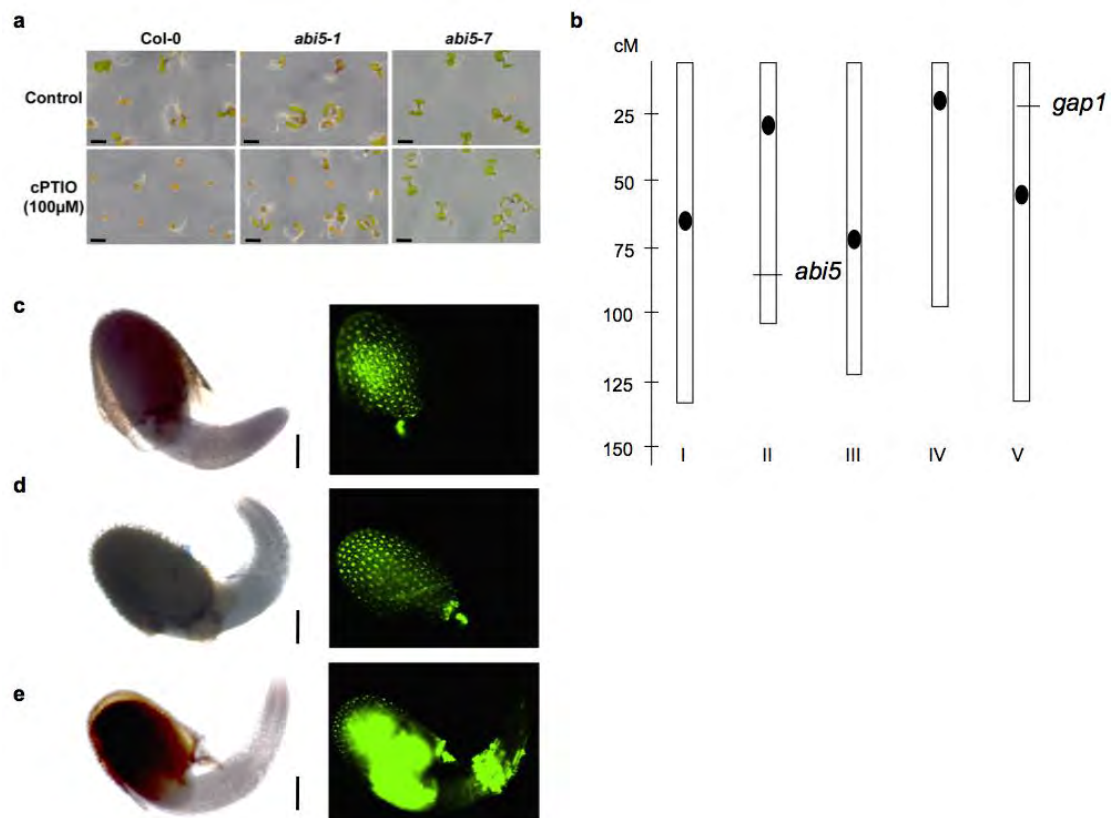

### Supplementary Figure 1. Identification and characterization of *gap* mutants.

#### Controls of endogenous NO detection in seeds by using DAF-2DA.

**a**, Post-germinative growth of wild-type (Col-0), *abi5-1* and *abi5-7* seedlings in media containing 0 and 100  $\mu$ M cPTIO after 6 days. Scale bars 1 mm.

**b**, Chromosomal position of the two identified loci (*abi5*, *gap1*). cM, centimorgan.

**c**, Autofluorescence of the testa tissues in untreated control seeds. Scale bar 100  $\mu$ m.

**d**, Fluorescence of seeds treated with the NO scavenger cPTIO (1 mM) that were stratified during 3 days at 4°C and germinated for 2 days at 21°C on agar plates and then subjected to DAF-2DA incubation. Scale bar 100  $\mu$ m.

**e**, NO production detected by DAF-2DA as in Figure 1c. For detection of endogenous NO production seeds were stratified for 3 days at 4°C and grown for 1 to 3 days at 21°C on agar plates and then subjected to DAF-2DA incubation. Scale bar 100  $\mu$ m.

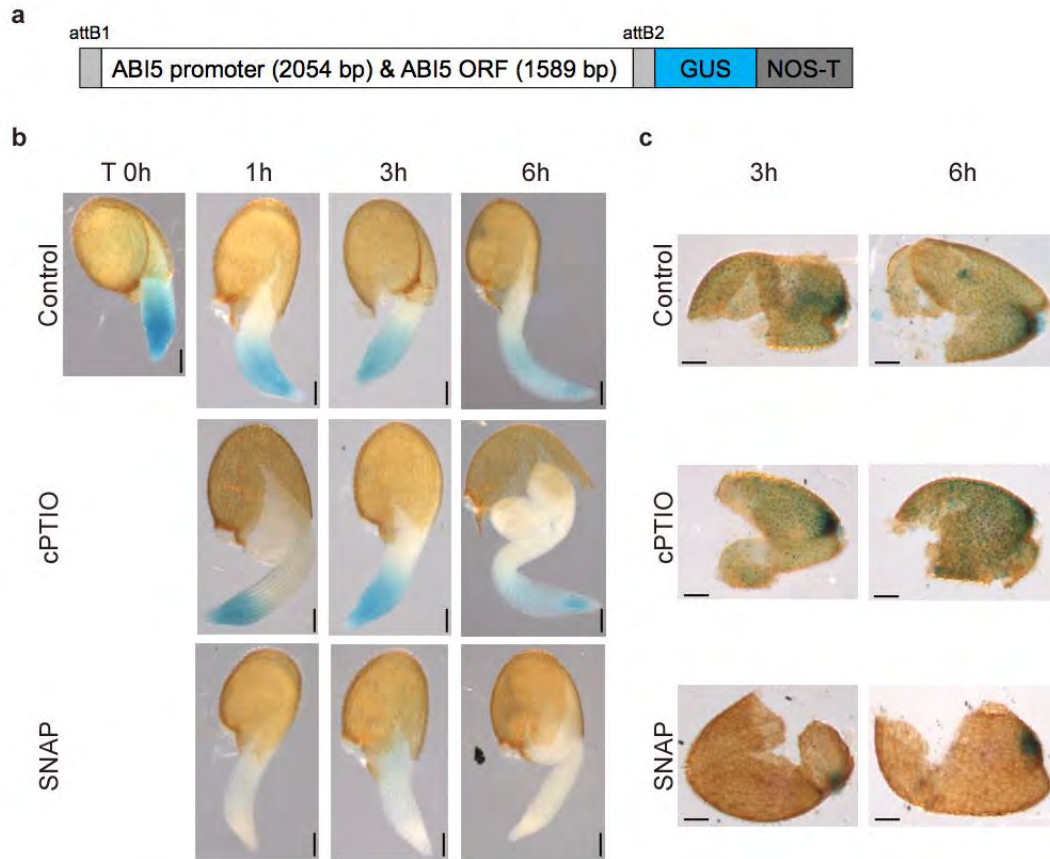

**Supplementary Figure 2. Tissue specific reduction of ABI5-GUS protein.**

**a**, Construct used to generate the *pABI5:ABI5-GUS* transgenic lines.

**b**, Representative GUS staining images of *pABI5:ABI5-GUS* 1 to 2-day-old seeds germinated on MS plates. Scale bars 100  $\mu$ m.

**c**, Representative GUS staining images of *pABI5:ABI5-GUS* 15-minutes imbibed testas after embryo removal. Scale bars 100  $\mu$ m.

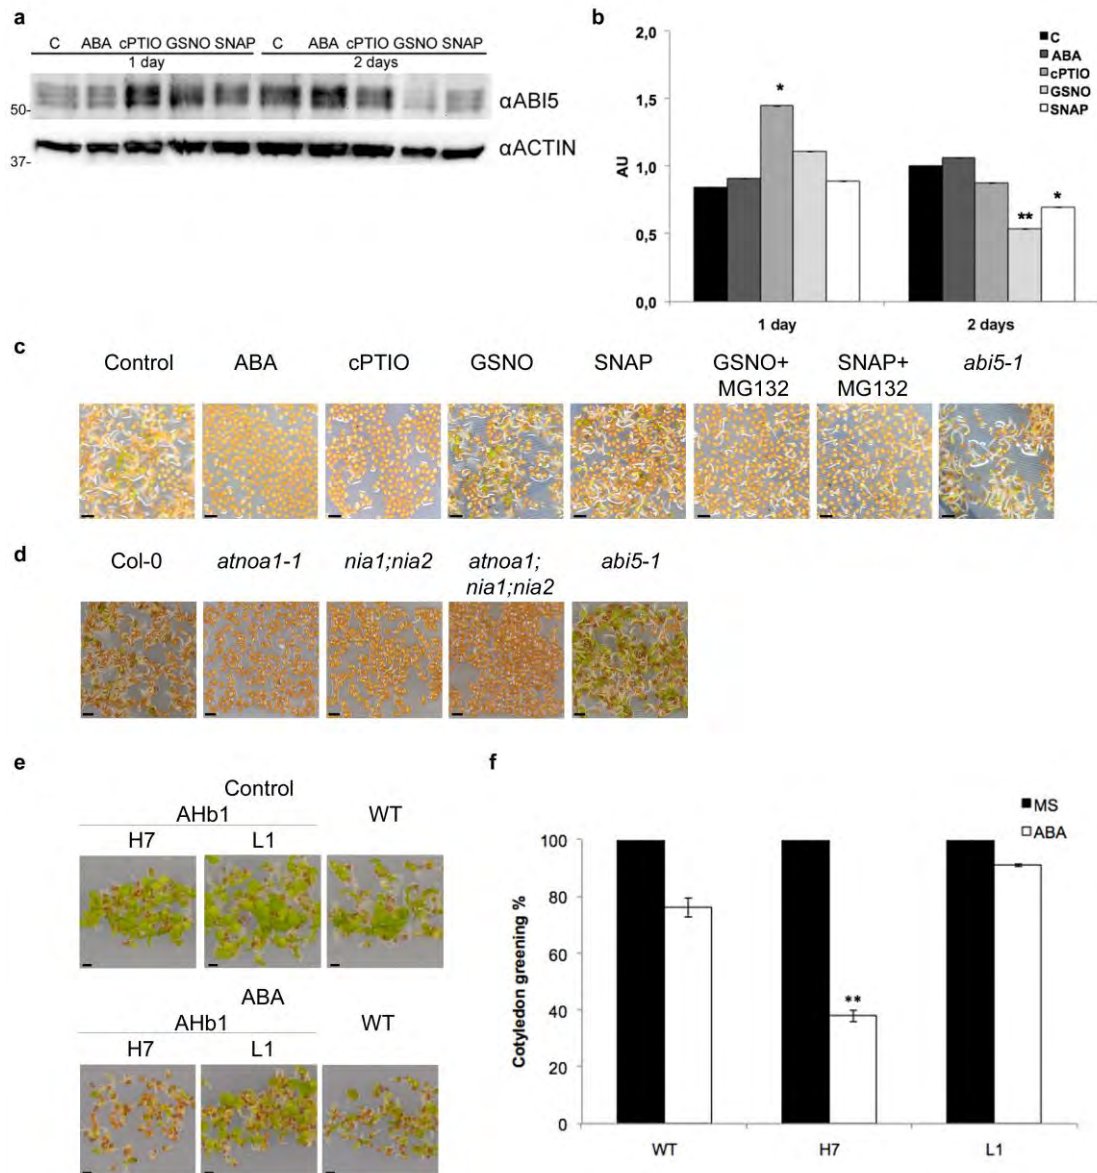

### Supplementary Figure 3. NO-promoted ABI5 degradation and seed germination phenotypes.

**a**, GSNO and SNAP treatments promote ABI5 degradation in 2 days ABA (5  $\mu$ M)-treated after ripened seeds. Immunoblot analysis of ABI5 protein levels in seed extracts of Col-0, treated with or without (C) ABA, NO scavenger (cPTIO) and NO donors (GSNO and SNAP). Actin protein levels are shown as a loading control.

**b**, Quantitative data of immunoblot analysis of ABI5 protein levels in seed extracts of Col-0, treated with or without (C) ABA, NO scavenger (cPTIO) and NO donors (GSNO and SNAP). Values represent the mean  $\pm$ SE ( $n=3$ ) and normalized against actin. Asterisks indicate significant differences compared with C ( $t$ -test, \* $P<0.05$ , \*\* $P<0.01$ ). AU, arbitrary units.

- c**, Representative seed germination images of wild-type (Col-0) dormant seeds grown for 4 days on MS agar plates untreated (Control, C), or supplemented with 5  $\mu$ M ABA, 300  $\mu$ M of the NO-scavenger cPTIO, 300  $\mu$ M of the NO-donors GSNO and SNAP and 300  $\mu$ M GSNO or SNAP plus 100  $\mu$ M of the proteasome inhibitor MG132. Phenotype of *abi5-1* mutant is included as a control. Scale bars 1 mm.
- d**, Representative seed germination images of wild-type (Col-0) and mutants *atnoa1-1*, *nia1nia2*, *atnoa1-2nia1nia2*, and *abi5-1* 4-day-old seedlings in the presence of 0.1  $\mu$ M ABA highlighting germination inhibition. Scale bars 1 mm.
- e**, Representative seed germination images of WT, *35S:AHb1* (H7) and *35S:antiAHb1* (L1) 4-day-old seedlings in MS (Control) and 0.1  $\mu$ M ABA. Scale bars 1 mm.
- f**, Graph showing the quantification of seed germination in WT, *35S:AHb1* (H7) and *35S:antiAHb1* (L1) 4-day-old seedlings in MS (Control) and 0.1  $\mu$ M ABA. Values represent the mean  $\pm$ SE ( $n=3$ ). Asterisks indicate significant differences compared with WT ( $t$ -test,  $**P<0.01$ ).

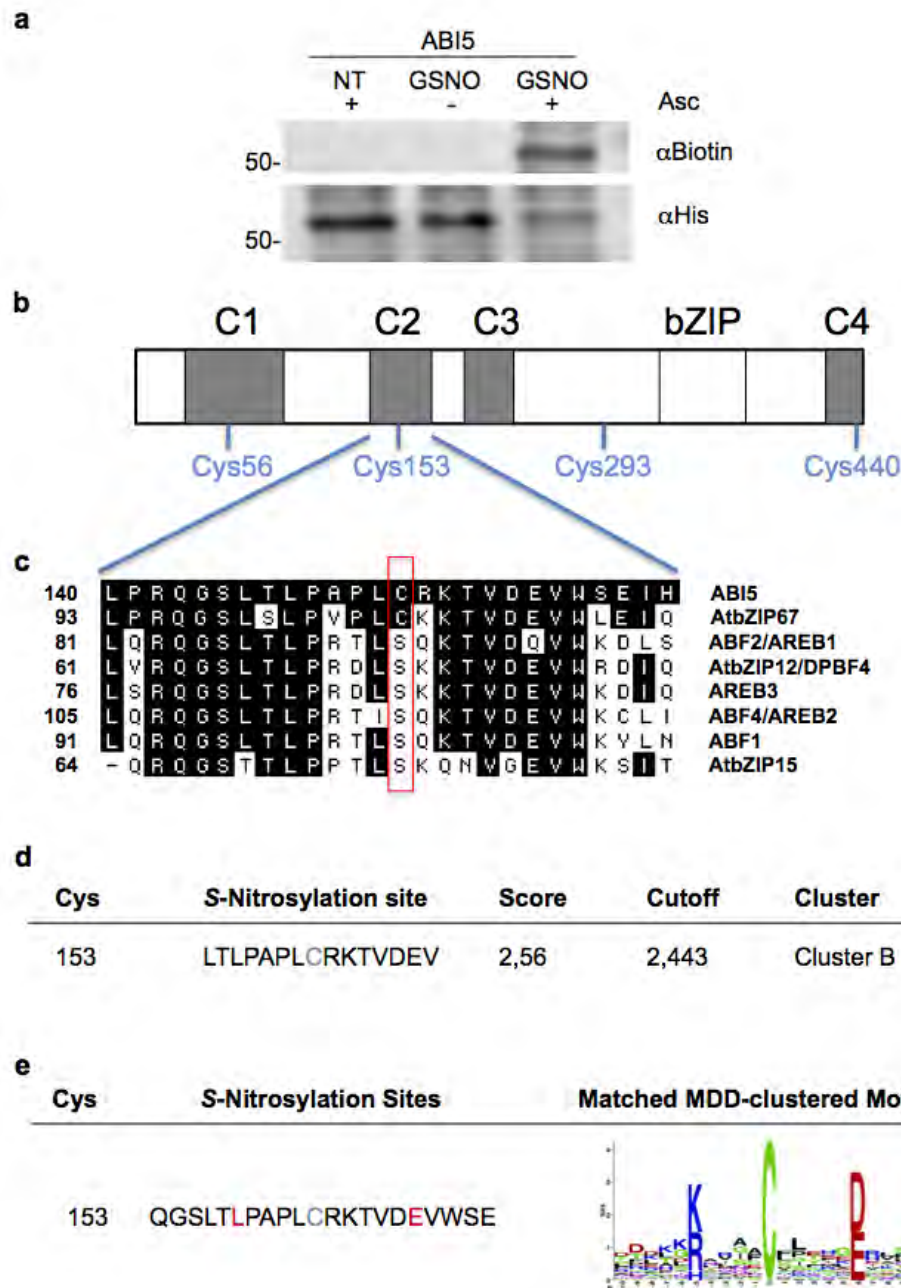

**Supplementary Figure 4. *In vitro* S-nitrosylation of ABI5 and identification of the candidate ABI5 Cys residue *in silico*.**

**a**, *In vitro* S-nitrosylation of wild-type ABI5 recombinant protein by the NO donor GSNO (200  $\mu$ M). Sodium ascorbate (Asc) was used to specifically detect S-nitrosylated SNO-ABI5. ABI5 protein loading was detected by anti-His antibody.

**b**, Schematic ABI5 structure showing the conserved domains (C1-4 and bZIP) and the position of the 4 Cys residues.

**c,** Sequence alignment of ABI5 (At2g36270) protein with other members of the ABI5-like bZIP family in Arabidopsis. Positions with identical amino acids residues are highlighted in black. The Cys residue is red boxed.

**d,** Computational prediction of ABI5 S-nitrosylation sites. GPS-SNO (<http://sno.biocuckoo.org>)<sup>1</sup> has been used to calculate ABI5 Cys targets of S-nitrosylation using the High Threshold option.

**e,** dbSNO database (<http://csb.cse.yzu.edu.tw/SNOSite/index.html>)<sup>2</sup> has been also used to predict ABI5 S-nitrosylation sites identifying the matched MDD-clustered motifs of the target cysteines. MDD: maximal dependence decomposition. Target Cys of the MDD-clustered motif is in green, and the maximal dependence with the occurrence of basic (blue) or acid (red) amino acids in each position is marked. Target Cys of the S-nitrosylation sites are in blue and amino acids that match with the respective MDD-clustered motif are in red.

# Mascot Search Results

## Protein View

Match to: [gi|18404091](#) Score: 682

**protein abscisic acid-insensitive 5 [Arabidopsis thaliana]**

Found in search of MCR3\_sin reducir\_30%\_RC6\_01\_5646.mgf

Nominal mass ( $M_r$ ): **46978**; Calculated pI value: **9.08**

NCBI BLAST search of [gi|18404091](#) against nr

Unformatted [sequence string](#) for pasting into other applications

Taxonomy: [Arabidopsis thaliana](#)

Links to retrieve other entries containing this sequence from NCBI Entrez:

[gi|75313515](#) from [Arabidopsis thaliana](#)

[gi|4510349](#) from [Arabidopsis thaliana](#)

[gi|13346151](#) from [Arabidopsis thaliana](#)

[gi|111074502](#) from [Arabidopsis thaliana](#)

[gi|330254132](#) from [Arabidopsis thaliana](#)

Variable modifications: Oxidation (M), Biotin-HPDP (C)

Cleavage by Trypsin: cuts C-term side of KR unless next residue is P

Sequence Coverage: 25%

Matched peptides shown in **Bold Red**

```
1  MVTRETKLTS EREVESSMAQ ARHNGGGGGE NHPFTSLGRQ SSIYSLTLDE
51 FQHALCENGK NFGSMNMDEF LVSIWNAEEN NNNQQQAAAA AGSHSVPANH
101 NGFNNNNNNNG GEGGVGVFSG GSRGNEDANN KRGIANESSL PRQGSLTLPA
151 PLCRKTVDEV WSEIHRGGGS GNGGDSNGRS SSSNGQNNAQ NGGETAARQP
201 TFGEMTLEDF LVKAGVVREH PTNPKPNPNP NQNQNPSVI PAAAQQQLYG
251 VFQGTGDPST PGQAMGVGDP SGYAKRTGGG GYQQAPPVQA GVCYGGGVGF
301 GAGGQQMGHV GPLSPVSSDG LGHGQVDNIG GQYGVDMGGL RGRKRVVDGP
351 VEKVVERRQR RMIKNRESAA RSRARKQAYT VELEAELNQL KEENAQLKHA
401 LAELERKRKQ QYFESLKSRA QPKLPKSNR LRTLMRNPSC PL
```

Show predicted peptides also

Sort Peptides By

☒ Residue Number ☐ Increasing Mass ☐ Decreasing Mass

| Start - End | Observed  | Mr(expt)  | Mr(calc)  | Delta   | Miss Sequence                                                           |
|-------------|-----------|-----------|-----------|---------|-------------------------------------------------------------------------|
| 8 - 22      | 855.3200  | 1708.6254 | 1708.8050 | -0.1795 | 1 K.LTSEREVESSMAQAR.H Oxidation (M) ( <a href="#">Ions score 55</a> )   |
| 8 - 22      | 855.3200  | 1708.6254 | 1708.8050 | -0.1795 | 1 K.LTSEREVESSMAQAR.H Oxidation (M) ( <a href="#">Ions score 49</a> )   |
| 8 - 22      | 570.5900  | 1708.7482 | 1708.8050 | -0.0568 | 1 K.LTSEREVESSMAQAR.H Oxidation (M) ( <a href="#">Ions score 10</a> )   |
| 8 - 22      | 570.6900  | 1709.0482 | 1708.8050 | 0.2432  | 1 K.LTSEREVESSMAQAR.H Oxidation (M) ( <a href="#">Ions score 57</a> )   |
| 13 - 22     | 554.2100  | 1106.4054 | 1106.5026 | -0.0971 | 0 R.EVESSMAQAR.H ( <a href="#">Ions score 73</a> )                      |
| 23 - 39     | 564.7700  | 1691.2882 | 1692.7717 | -1.4835 | 0 R.HNNGGGGGENHPFTSLGR.Q ( <a href="#">Ions score 39</a> )              |
| 23 - 39     | 846.8700  | 1691.7254 | 1692.7717 | -1.0462 | 0 R.HNNGGGGGENHPFTSLGR.Q ( <a href="#">Ions score 22</a> )              |
| 23 - 39     | 847.2800  | 1692.5454 | 1692.7717 | -0.2263 | 0 R.HNNGGGGGENHPFTSLGR.Q ( <a href="#">Ions score 88</a> )              |
| 23 - 39     | 847.2800  | 1692.5454 | 1692.7717 | -0.2263 | 0 R.HNNGGGGGENHPFTSLGR.Q ( <a href="#">Ions score 125</a> )             |
| 23 - 39     | 847.2800  | 1692.5454 | 1692.7717 | -0.2263 | 0 R.HNNGGGGGENHPFTSLGR.Q ( <a href="#">Ions score 8</a> )               |
| 23 - 39     | 565.2300  | 1692.6682 | 1692.7717 | -0.1035 | 0 R.HNNGGGGGENHPFTSLGR.Q ( <a href="#">Ions score 62</a> )              |
| 23 - 39     | 565.2300  | 1692.6682 | 1692.7717 | -0.1035 | 0 R.HNNGGGGGENHPFTSLGR.Q ( <a href="#">Ions score 64</a> )              |
| 23 - 39     | 565.2700  | 1692.7882 | 1692.7717 | 0.0165  | 0 R.HNNGGGGGENHPFTSLGR.Q ( <a href="#">Ions score 54</a> )              |
| 23 - 39     | 565.4600  | 1693.3582 | 1692.7717 | 0.5865  | 0 R.HNNGGGGGENHPFTSLGR.Q ( <a href="#">Ions score 46</a> )              |
| 23 - 39     | 847.7600  | 1693.5054 | 1692.7717 | 0.7338  | 0 R.HNNGGGGGENHPFTSLGR.Q ( <a href="#">Ions score 64</a> )              |
| 23 - 39     | 847.7800  | 1693.5454 | 1692.7717 | 0.7738  | 0 R.HNNGGGGGENHPFTSLGR.Q ( <a href="#">Ions score 62</a> )              |
| 23 - 39     | 565.5500  | 1693.6282 | 1692.7717 | 0.8565  | 0 R.HNNGGGGGENHPFTSLGR.Q ( <a href="#">Ions score 61</a> )              |
| 23 - 39     | 565.6100  | 1693.8082 | 1692.7717 | 1.0365  | 0 R.HNNGGGGGENHPFTSLGR.Q ( <a href="#">Ions score 60</a> )              |
| 23 - 39     | 565.7400  | 1694.1982 | 1692.7717 | 1.4265  | 0 R.HNNGGGGGENHPFTSLGR.Q ( <a href="#">Ions score 55</a> )              |
| 132 - 142   | 600.4100  | 1198.8054 | 1198.6418 | 0.1636  | 1 K.RGIANESSLPR.Q ( <a href="#">Ions score 83</a> )                     |
| 133 - 142   | 1043.4200 | 1042.4127 | 1042.5407 | -0.1280 | 0 R.GIANESSLPR.Q ( <a href="#">Ions score 31</a> )                      |
| 133 - 142   | 522.6100  | 1043.2054 | 1042.5407 | 0.6648  | 0 R.GIANESSLPR.Q ( <a href="#">Ions score 43</a> )                      |
| 143 - 154   | 842.4900  | 1682.9654 | 1682.8670 | 0.0984  | 0 R.QGSLTLPAPLCR.K Biotin-HPDP (C) ( <a href="#">Ions score 48</a> )    |
| 143 - 154   | 562.0100  | 1683.0082 | 1682.8670 | 0.1412  | 0 R.QGSLTLPAPLCR.K Biotin-HPDP (C) ( <a href="#">Ions score 30</a> )    |
| 155 - 166   | 749.7900  | 1497.5654 | 1497.7576 | -0.1921 | 1 R.KTVDEVWSEIHR.G ( <a href="#">Ions score 99</a> )                    |
| 155 - 166   | 500.2200  | 1497.6382 | 1497.7576 | -0.1194 | 1 R.KTVDEVWSEIHR.G ( <a href="#">Ions score 54</a> )                    |
| 155 - 166   | 749.8500  | 1497.6854 | 1497.7576 | -0.0721 | 1 R.KTVDEVWSEIHR.G ( <a href="#">Ions score 88</a> )                    |
| 155 - 166   | 749.9000  | 1497.7854 | 1497.7576 | 0.0279  | 1 R.KTVDEVWSEIHR.G ( <a href="#">Ions score 88</a> )                    |
| 155 - 166   | 500.5200  | 1498.5382 | 1497.7576 | 0.7806  | 1 R.KTVDEVWSEIHR.G ( <a href="#">Ions score 54</a> )                    |
| 156 - 166   | 685.7500  | 1369.4854 | 1369.6626 | -0.1772 | 0 K.TVDEVWSEIHR.G ( <a href="#">Ions score 65</a> )                     |
| 156 - 166   | 685.8200  | 1369.6254 | 1369.6626 | -0.0372 | 0 K.TVDEVWSEIHR.G ( <a href="#">Ions score 67</a> )                     |
| 156 - 166   | 685.8200  | 1369.6254 | 1369.6626 | -0.0372 | 0 K.TVDEVWSEIHR.G ( <a href="#">Ions score 56</a> )                     |
| 156 - 166   | 685.8800  | 1369.7454 | 1369.6626 | 0.0828  | 0 K.TVDEVWSEIHR.G ( <a href="#">Ions score 55</a> )                     |
| 156 - 166   | 685.8900  | 1369.7654 | 1369.6626 | 0.1028  | 0 K.TVDEVWSEIHR.G ( <a href="#">Ions score 57</a> )                     |
| 156 - 166   | 685.9100  | 1369.8054 | 1369.6626 | 0.1428  | 0 K.TVDEVWSEIHR.G ( <a href="#">Ions score 60</a> )                     |
| 156 - 166   | 685.9200  | 1369.8254 | 1369.6626 | 0.1628  | 0 K.TVDEVWSEIHR.G ( <a href="#">Ions score 60</a> )                     |
| 156 - 166   | 685.9500  | 1369.8854 | 1369.6626 | 0.2228  | 0 K.TVDEVWSEIHR.G ( <a href="#">Ions score 53</a> )                     |
| 156 - 166   | 685.9600  | 1369.9054 | 1369.6626 | 0.2428  | 0 K.TVDEVWSEIHR.G ( <a href="#">Ions score 58</a> )                     |
| 156 - 166   | 457.7100  | 1370.1082 | 1369.6626 | 0.4455  | 0 K.TVDEVWSEIHR.G ( <a href="#">Ions score 26</a> )                     |
| 167 - 198   | 974.9900  | 2921.9482 | 2921.2229 | 0.7253  | 1 R.GGGSGNGGDSNGRSSSSNGQNNQNGGETAAR.Q ( <a href="#">Ions score 16</a> ) |
| 199 - 213   | 877.3700  | 1752.7254 | 1753.8597 | -1.1342 | 0 R.QPTFGEMTLEDFLVK.A ( <a href="#">Ions score 33</a> )                 |
| 199 - 213   | 877.3700  | 1752.7254 | 1753.8597 | -1.1342 | 0 R.QPTFGEMTLEDFLVK.A ( <a href="#">Ions score 15</a> )                 |
| 199 - 213   | 877.3800  | 1752.7454 | 1753.8597 | -1.1142 | 0 R.QPTFGEMTLEDFLVK.A ( <a href="#">Ions score 29</a> )                 |
| 199 - 213   | 877.3800  | 1752.7454 | 1753.8597 | -1.1142 | 0 R.QPTFGEMTLEDFLVK.A ( <a href="#">Ions score 17</a> )                 |
| 199 - 213   | 877.3900  | 1752.7654 | 1753.8597 | -1.0942 | 0 R.QPTFGEMTLEDFLVK.A ( <a href="#">Ions score 31</a> )                 |
| 199 - 213   | 877.3900  | 1752.7654 | 1753.8597 | -1.0942 | 0 R.QPTFGEMTLEDFLVK.A ( <a href="#">Ions score 18</a> )                 |
| 199 - 213   | 877.3900  | 1752.7654 | 1753.8597 | -1.0942 | 0 R.QPTFGEMTLEDFLVK.A ( <a href="#">Ions score 32</a> )                 |
| 199 - 213   | 877.3900  | 1752.7654 | 1753.8597 | -1.0942 | 0 R.QPTFGEMTLEDFLVK.A ( <a href="#">Ions score 32</a> )                 |
| 199 - 213   | 877.4000  | 1752.7854 | 1753.8597 | -1.0742 | 0 R.QPTFGEMTLEDFLVK.A ( <a href="#">Ions score 32</a> )                 |
| 199 - 213   | 877.4000  | 1752.7854 | 1753.8597 | -1.0742 | 0 R.QPTFGEMTLEDFLVK.A ( <a href="#">Ions score 17</a> )                 |
| 199 - 213   | 877.9000  | 1753.7854 | 1753.8597 | -0.0742 | 0 R.QPTFGEMTLEDFLVK.A ( <a href="#">Ions score 69</a> )                 |
| 199 - 213   | 585.6400  | 1753.8982 | 1753.8597 | 0.0385  | 0 R.QPTFGEMTLEDFLVK.A ( <a href="#">Ions score 51</a> )                 |
| 199 - 213   | 885.3800  | 1768.7454 | 1769.8546 | -1.1092 | 0 R.QPTFGEMTLEDFLVK.A Oxidation (M) ( <a href="#">Ions score 51</a> )   |
| 199 - 213   | 885.8400  | 1769.6654 | 1769.8546 | -0.1892 | 0 R.QPTFGEMTLEDFLVK.A Oxidation (M) ( <a href="#">Ions score 48</a> )   |
| 199 - 213   | 885.8600  | 1769.7054 | 1769.8546 | -0.1492 | 0 R.QPTFGEMTLEDFLVK.A Oxidation (M) ( <a href="#">Ions score 53</a> )   |
| 199 - 213   | 885.8700  | 1769.7254 | 1769.8546 | -0.1292 | 0 R.QPTFGEMTLEDFLVK.A Oxidation (M) ( <a href="#">Ions score 50</a> )   |
| 199 - 213   | 885.8700  | 1769.7254 | 1769.8546 | -0.1292 | 0 R.QPTFGEMTLEDFLVK.A Oxidation (M) ( <a href="#">Ions score 70</a> )   |
| 199 - 213   | 885.8700  | 1769.7254 | 1769.8546 | -0.1292 | 0 R.QPTFGEMTLEDFLVK.A Oxidation (M) ( <a href="#">Ions score 54</a> )   |
| 199 - 213   | 885.8800  | 1769.7454 | 1769.8546 | -0.1092 | 0 R.QPTFGEMTLEDFLVK.A Oxidation (M) ( <a href="#">Ions score 50</a> )   |
| 199 - 213   | 885.8800  | 1769.7454 | 1769.8546 | -0.1092 | 0 R.QPTFGEMTLEDFLVK.A Oxidation (M) ( <a href="#">Ions score 66</a> )   |
| 199 - 213   | 885.8800  | 1769.7454 | 1769.8546 | -0.1092 | 0 R.QPTFGEMTLEDFLVK.A Oxidation (M) ( <a href="#">Ions score 51</a> )   |
| 199 - 213   | 885.8800  | 1769.7454 | 1769.8546 | -0.1092 | 0 R.QPTFGEMTLEDFLVK.A Oxidation (M) ( <a href="#">Ions score 44</a> )   |
| 199 - 213   | 885.8900  | 1769.7654 | 1769.8546 | -0.0892 | 0 R.QPTFGEMTLEDFLVK.A Oxidation (M) ( <a href="#">Ions score 51</a> )   |
| 199 - 213   | 885.8900  | 1769.7654 | 1769.8546 | -0.0892 | 0 R.QPTFGEMTLEDFLVK.A Oxidation (M) ( <a href="#">Ions score 66</a> )   |
| 199 - 213   | 885.9000  | 1769.7854 | 1769.8546 | -0.0692 | 0 R.QPTFGEMTLEDFLVK.A Oxidation (M) ( <a href="#">Ions score 64</a> )   |
| 199 - 213   | 885.9000  | 1769.7854 | 1769.8546 | -0.0692 | 0 R.QPTFGEMTLEDFLVK.A Oxidation (M) ( <a href="#">Ions score 66</a> )   |
| 199 - 213   | 885.9000  | 1769.7854 | 1769.8546 | -0.0692 | 0 R.QPTFGEMTLEDFLVK.A Oxidation (M) ( <a href="#">Ions score 61</a> )   |
| 199 - 213   | 885.9000  | 1769.7854 | 1769.8546 | -0.0692 | 0 R.QPTFGEMTLEDFLVK.A Oxidation (M) ( <a href="#">Ions score 62</a> )   |
| 199 - 213   | 885.9000  | 1769.7854 | 1769.8546 | -0.0692 | 0 R.QPTFGEMTLEDFLVK.A Oxidation (M) ( <a href="#">Ions score 70</a> )   |
| 199 - 213   | 885.9000  | 1769.7854 | 1769.8546 | -0.0692 | 0 R.QPTFGEMTLEDFLVK.A Oxidation (M) ( <a href="#">Ions score 67</a> )   |
| 199 - 213   | 885.9000  | 1769.7854 | 1769.8546 | -0.0692 | 0 R.QPTFGEMTLEDFLVK.A Oxidation (M) ( <a href="#">Ions score 72</a> )   |
| 199 - 213   | 590.9800  | 1769.9182 | 1769.8546 | 0.0636  | 0 R.QPTFGEMTLEDFLVK.A Oxidation (M) ( <a href="#">Ions score 52</a> )   |
| 199 - 213   | 886.0500  | 1770.0854 | 1769.8546 | 0.2308  | 0 R.QPTFGEMTLEDFLVK.A Oxidation (M) ( <a href="#">Ions score 66</a> )   |

LOCUS NP\_565840 442 aa linear PLN 28-MAY-2011  
 DEFINITION protein abscisic acid-insensitive 5 [Arabidopsis thaliana].  
 ACCESSION NP\_565840  
 VERSION NP\_565840.1 GI:18404091  
 DBSOURCE REFSEQ: accession [NM\\_129185.3](#)  
 KEYWORDS .  
 SOURCE Arabidopsis thaliana (thale cress)  
 ORGANISM [Arabidopsis thaliana](#)  
 Eukaryota; Viridiplantae; Streptophyta; Embryophyta; Tracheophyta;  
 Spermatophyta; Magnoliophyta; eudicotyledons; core eudicotyledons;  
 rosids; malvids; Brassicales; Brassicaceae; Camelineae;  
 Arabidopsis.  
 REFERENCE 1 (residues 1 to 442)  
 AUTHORS Lin,X., Kaul,S., Rounsley,S., Shea,T.P., Benito,M.I., Town,C.D.,  
 Fujii,C.Y., Mason,T., Bowman,C.L., Barnstead,M., Feldblyum,T.V.,  
 Buell,C.R., Ketchum,K.A., Lee,J., Ronning,C.M., Koo,H.L.,  
 Moffat,K.S., Cronin,L.A., Shen,M., Pai,G., Van Aken,S., Umayam,L.,  
 Tallon,L.J., Gill,J.E., Adams,M.D., Carrera,A.J., Creasy,T.H.,  
 Goodman,H.M., Somerville,C.R., Copenhaver,G.P., Preuss,D.,  
 Nierman,W.C., White,O., Eisen,J.A., Salzberg,S.L., Fraser,C.M. and  
 Venter,J.C.  
 TITLE Sequence and analysis of chromosome 2 of the plant Arabidopsis  
 thaliana  
 JOURNAL Nature 402 (6763), 761-768 (1999)  
 PUBMED [10617197](#)  
 REFERENCE 2 (residues 1 to 442)  
 CONSRM Arabidopsis TAIR10 Release  
 TITLE Direct Submission  
 JOURNAL Submitted (18-FEB-2011) Department of Plant Biology, Carnegie  
 Institution, 260 Panama Street, Stanford, CA, USA  
 COMMENT REVIEWED [REFSEQ](#): This record has been curated by TAIR. The  
 reference sequence is identical to [AEC09226](#).  
 Method: conceptual translation.  
 FEATURES  
 source Location/Qualifiers  
 1..442  
 /organism="Arabidopsis thaliana"  
 /db\_xref="taxon:[3702](#)"  
 /chromosome="2"  
 /ecotype="Columbia"  
[Protein](#) 1..442  
 /product="protein abscisic acid-insensitive 5"  
 /calculated\_mol\_wt=46876  
[Region](#) 356..410  
 /region\_name="bZIP\_1"  
 /note="bZIP transcription factor; c102576"  
 /db\_xref="CDD:[198728](#)"  
[CDS](#) 1..442  
 /gene="ABI5"  
 /locus\_tag="AT2G36270"  
 /gene\_synonym="ABA INSENSITIVE 5; ABI5; F2H17.12;  
 F2H17\_12; GIA1; GROWTH-INSENSITIVITY TO ABA 1"  
 /coded\_by="NM\_129185.3:176..1504"  
 /inference="Similar to DNA  
 sequence:INSD:AF334206.1,INSD:BT026517.1"  
 /inference="Similar to RNA sequence,  
 EST:INSD:DR750187.1,INSD:DR350305.1,INSD:DR225222.1,  
 INSD:ES148762.1,INSD:ES150720.1,INSD:DR225221.1,  
 INSD:ES001012.1,INSD:DR384053.1,INSD:ES005968.1,  
 INSD:ES088346.1,INSD:EL982026.1,INSD:AV785099.1,  
 INSD:ES143521.1,INSD:BP650811.1,INSD:DN604474.1,  
 INSD:DR350304.1,INSD:DR260503.1,INSD:EL987210.1,  
 INSD:EL997657.1,INSD:ES163518.1,INSD:ES101562.1,  
 INSD:DR260508.1,INSD:ES152551.1,INSD:BP644492.1,  
 INSD:AV820566.1,INSD:AV823993.1,INSD:ES092060.1,  
 INSD:DR260509.1"  
 /note="Basic-leucine zipper (bZIP) transcription factor  
 family protein ABA INSENSITIVE 5 (ABI5); CONTAINS InterPro  
 DOMAIN/s: Basic-leucine zipper (bZIP) transcription factor  
 (InterPro:IPR004827), bZIP transcription factor, bZIP-1  
 (InterPro:IPR011616); BEST Arabidopsis thaliana protein  
 match is: abscisic acid responsive element-binding factor  
 1 (TAIR:AT1G49720.1); Has 3780 Blast hits to 3404 proteins  
 in 335 species: Archae - 4; Bacteria - 363; Metazoa - 820;  
 Fungi - 233; Plants - 1594; Viruses - 12; Other Eukaryotes  
 - 754 (source: NCBI BLINK)."  
 /db\_xref="GeneID:[818199](#)"  
 /db\_xref="TAIR:[AT2G36270](#)"

Mascot: <http://www.matrixscience.com/>

## Supplementary Figure 5. Analysis of *in vitro* ABI5 S-nitrosylation.

Protein sequence using protein view-MASCOT search, including observed mass, expected mass, calculated mass, Mascot score, expectation score and rank, and peptide sequence. Nominal mass (Mr).

a

## Mascot Search Results

### Peptide View

MS/MS Fragmentation of **QGSLTLPAPLCR**

Found in [gi|18404091](#) in **NCBI**, protein abscisic acid-insensitive 5 [Arabidopsis thaliana]

Match to Query 320: 1682.965448 from(842.490000,2+) intensity(304169.0000) index(316)

Title: Crap d 317, +MSn(842.5), 49.5 min

Data file MCR3\_sin reducir\_30%\_RC6\_01\_5646.mgf

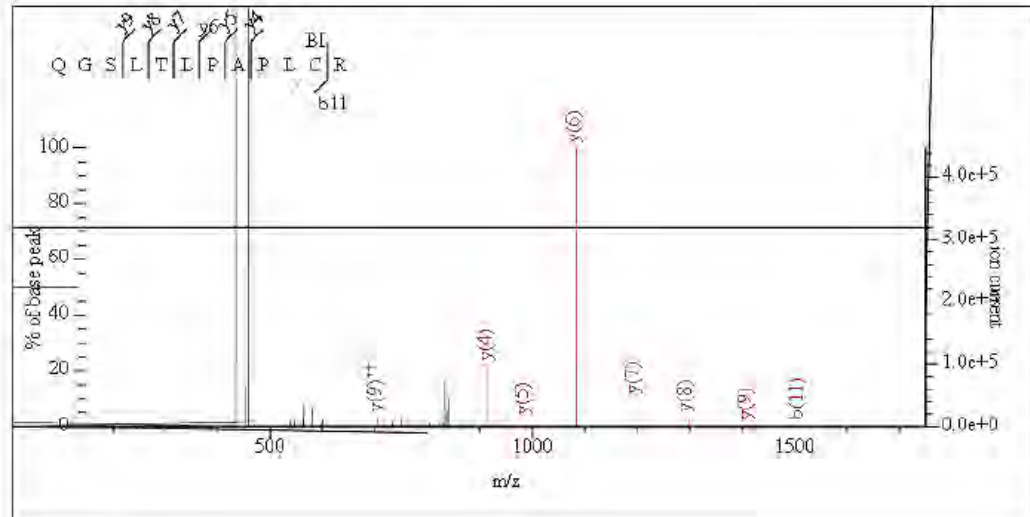

- Help
- Export as SVG

Pan left Zoom in Zoom out Undo pan or zoom Zoom reset 148.93 to 1750 Zoom to range Pan right

Label all possible matches ☐ Label matches used for scoring ☒

**Monoisotopic mass of neutral peptide Mr(calc):** 1682.8670

**Variable modifications:**

C11 : Biotin-HPDP (C)

**Ions Score:** 48 **Expect:** 0.13

**Matches :** 9/114 fragment ions using 13 most intense peaks ([help](#))

| #  | b         | b <sup>++</sup> | b <sup>+</sup> | b <sup>+++</sup> | b <sup>0</sup> | b <sup>0++</sup> | Seq. | y         | y <sup>++</sup> | y <sup>+</sup> | y <sup>+++</sup> | y <sup>0</sup> | y <sup>0++</sup> | #  |
|----|-----------|-----------------|----------------|------------------|----------------|------------------|------|-----------|-----------------|----------------|------------------|----------------|------------------|----|
| 1  | 129.0659  | 65.0366         | 112.0393       | 56.5233          |                |                  | Q    |           |                 |                |                  |                |                  | 12 |
| 2  | 186.0873  | 93.5473         | 169.0608       | 85.0340          |                |                  | G    | 1555.8157 | 778.4115        | 1538.7892      | 769.8982         | 1537.8052      | 769.4062         | 11 |
| 3  | 273.1193  | 137.0633        | 256.0928       | 128.5500         | 255.1088       | 128.0580         | S    | 1498.7943 | 749.9008        | 1481.7677      | 741.3875         | 1480.7837      | 740.8955         | 10 |
| 4  | 386.2034  | 193.6053        | 369.1769       | 185.0921         | 368.1928       | 184.6001         | L    | 1411.7622 | 706.3848        | 1394.7357      | 697.8715         | 1393.7517      | 697.3795         | 9  |
| 5  | 487.2511  | 244.1292        | 470.2245       | 235.6159         | 469.2405       | 235.1239         | T    | 1298.6782 | 649.8427        | 1281.6516      | 641.3294         | 1280.6676      | 640.8374         | 8  |
| 6  | 600.3352  | 300.6712        | 583.3086       | 292.1579         | 582.3246       | 291.6659         | L    | 1197.6305 | 599.3189        | 1180.6039      | 590.8056         |                |                  | 7  |
| 7  | 697.3879  | 349.1976        | 680.3614       | 340.6843         | 679.3774       | 340.1923         | P    | 1084.5464 | 542.7769        | 1067.5199      | 534.2636         |                |                  | 6  |
| 8  | 768.4250  | 384.7162        | 751.3985       | 376.2029         | 750.4145       | 375.7109         | A    | 987.4937  | 494.2505        | 970.4671       | 485.7372         |                |                  | 5  |
| 9  | 865.4778  | 433.2425        | 848.4512       | 424.7293         | 847.4672       | 424.2373         | P    | 916.4565  | 458.7319        | 899.4300       | 450.2186         |                |                  | 4  |
| 10 | 978.5619  | 489.7846        | 961.5353       | 481.2713         | 960.5513       | 480.7793         | L    | 819.4038  | 410.2055        | 802.3772       | 401.6923         |                |                  | 3  |
| 11 | 1509.7626 | 755.3850        | 1492.7361      | 746.8717         | 1491.7521      | 746.3797         | C    | 706.3197  | 353.6635        | 689.2932       | 345.1502         |                |                  | 2  |
| 12 |           |                 |                |                  |                |                  | R    | 175.1190  | 88.0631         | 158.0924       | 79.5498          |                |                  | 1  |

Error Distribution Error Distribution (ppm)

NCBI BLAST search of [QGSLTLPAPLCR](#)

(Parameters: blastp, nr protein database, expect=20000, no filter, PAM30)

Other BLAST [web gateways](#)

**b**

All matches to this query

| Score | Mr(calc)  | Delta   | Sequence                          |
|-------|-----------|---------|-----------------------------------|
| 47.9  | 1682.8670 | 0.0984  | <a href="#">QGSLLPAPLCR</a>       |
| 24.0  | 1682.8951 | 0.0703  | <a href="#">SSAIQLPAGKSPVGDTR</a> |
| 21.9  | 1682.8450 | 0.1204  | <a href="#">CYKIGSSTFPLSGAPR</a>  |
| 21.6  | 1682.8886 | 0.0769  | <a href="#">LSCSLSDPSPPLRRR</a>   |
| 19.0  | 1682.7990 | 0.1665  | <a href="#">GTRHNMNALPCR</a>      |
| 15.4  | 1682.8965 | 0.0690  | <a href="#">QHGEIRFIGRTDVR</a>    |
| 15.3  | 1682.8515 | 0.1139  | <a href="#">NGLTTLFKEDPSAYK</a>   |
| 14.2  | 1683.0155 | -0.0501 | <a href="#">RVGIVGLGSTGSLIAKR</a> |
| 14.1  | 1682.9328 | 0.0326  | <a href="#">HRSHPTTSAPLRPSK</a>   |
| 13.9  | 1682.8587 | 0.1067  | <a href="#">EGETTIGEVPATPRR</a>   |

**Supplementary Figure 6. Analysis of *in vitro* ABI5 S-nitrosylation.**

**a**, Peptide view-MASCOT search showing the MS/MS spectrum.

**b**, Peptide view-MASCOT search showing all matched ions. Nominal mass (Mr).



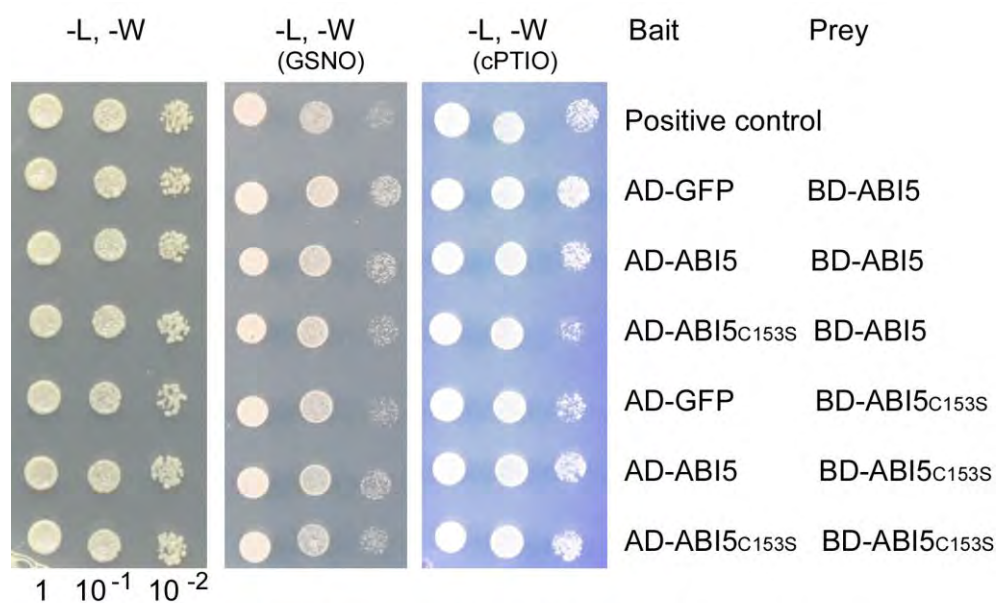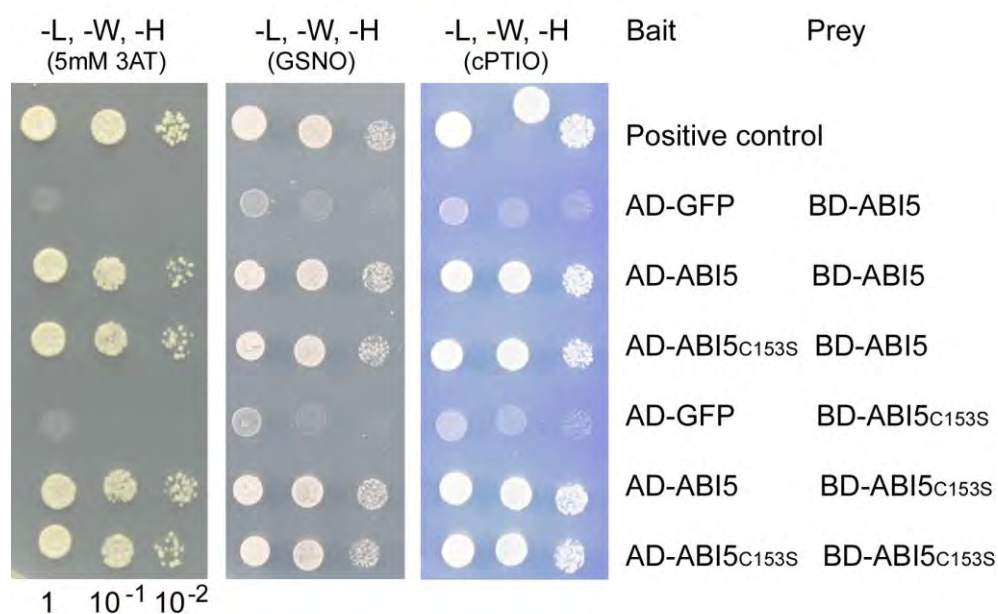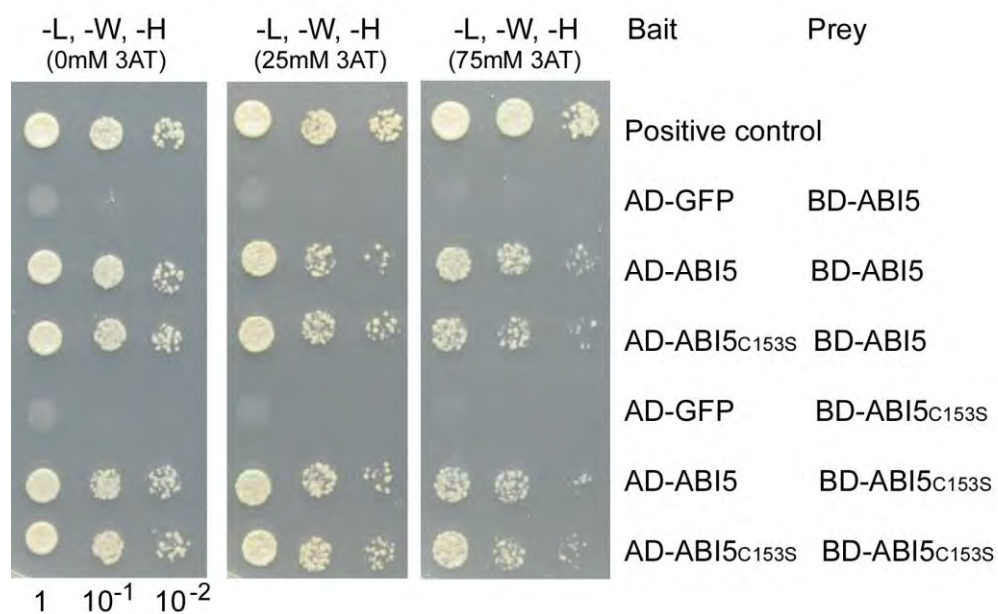

**Supplementary Figure 8. ABI5 Cys153 mutation does not abolish protein homodimerization.** Yeast two-hybrid assay for ABI5 protein homodimerization. Two-hybrid interaction test of ABI5 (wild-type) and ABI5C153S (mutated version). Upper, control plates. Middle and right, test plates (-His) and (-His, +3-Amino-Triazole), respectively. For the constructs, the ABI5 and ABI5C153S were fused to the Gal4 DNA-binding domain (BD) and Gal4 activation domain (AD) as indicated.

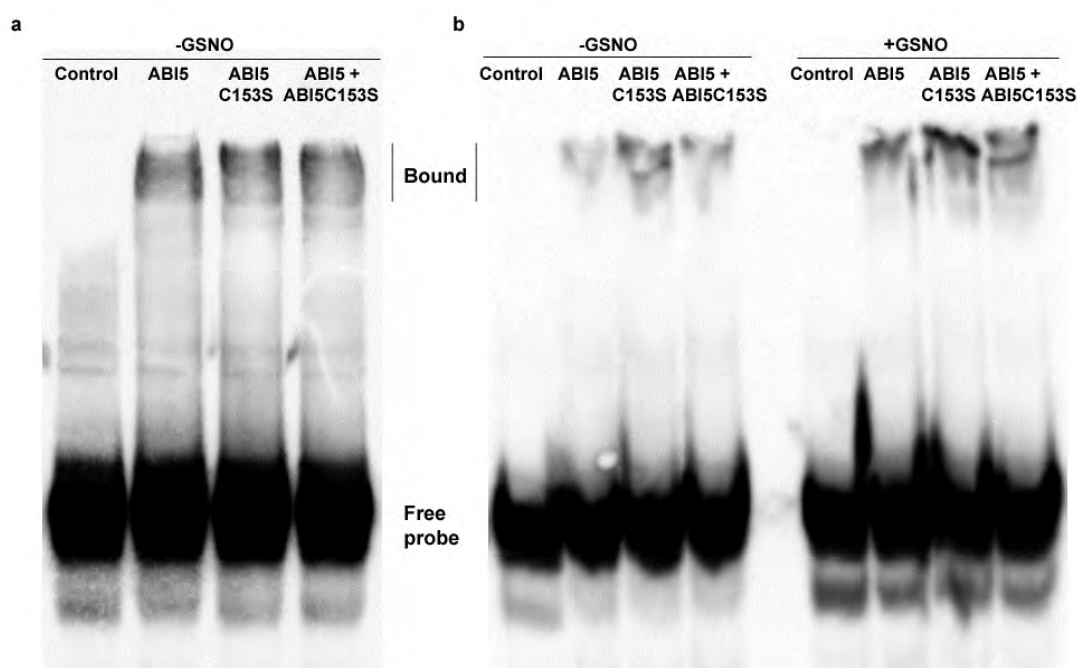

**Supplementary Figure 9. ABI5 Cys153 mutation and S-nitrosylation do not abolish DNA binding.**

**a**, Electrophoretic mobility shift assay (EMSA) of ABI5 (wild-type) and ABI5C153S (mutated version) binding to DNA fragments containing the ABRE motif under reducing conditions.

**b**, EMSA of ABI5 (wild-type) and ABI5C153S (mutated version) binding to DNA fragments containing the ABRE motif under non-reducing conditions and in the absence and presence of GSNO (1 mM).

See Methods for a description of the probe. (Control) ABRE-box incubated without recombinant protein.

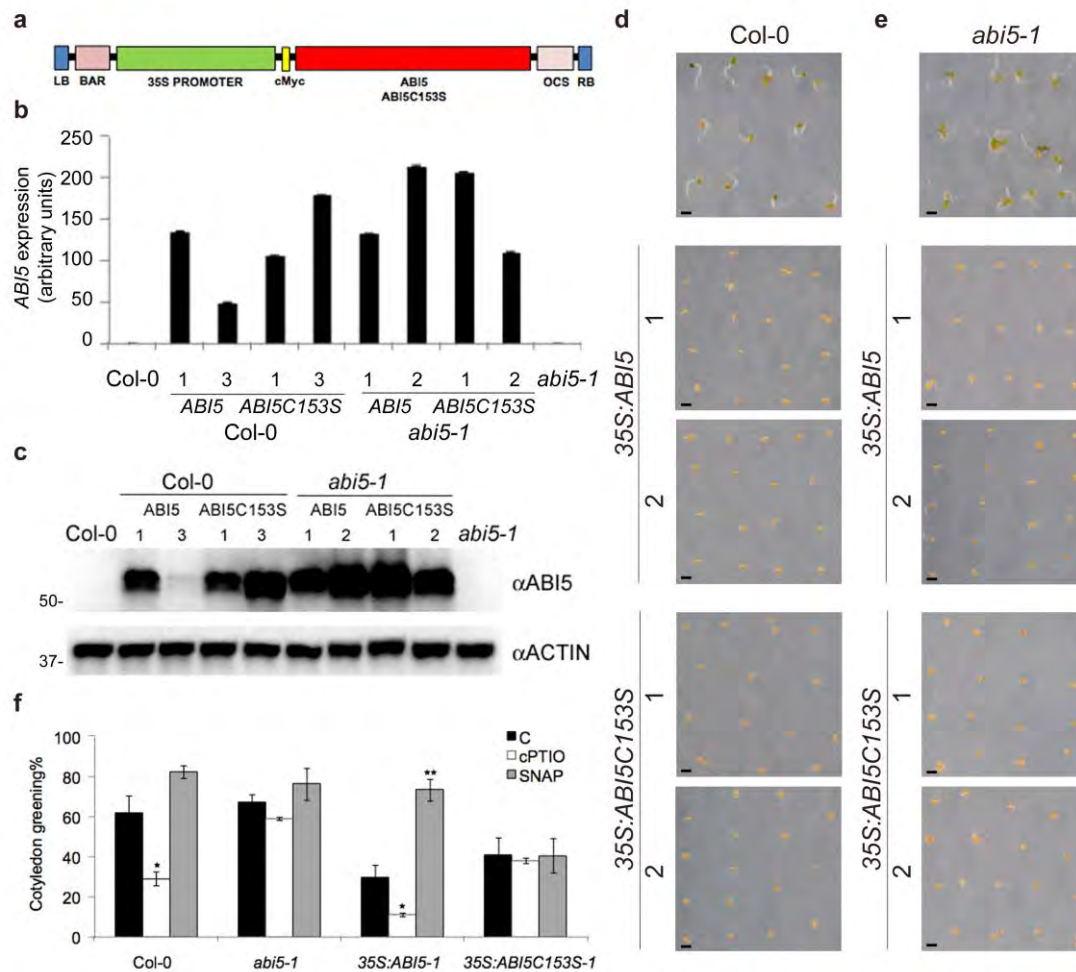

**Supplementary Figure 10. Generation and molecular analysis of 35S:ABI5 and 35S:ABI5C153S transgenic lines.**

**a**, Construct used to generate the transgenic lines.

**b**, Q RT-PCR analysis of *ABI5* expression levels in Col-0, the *abi5-1* background and 35S:ABI5 and 35S:ABI5C153S transgenic lines.

**c**, ABI5 levels in 35S:ABI5 and 35S:ABI5C153S transgenic plants. Immunoblot analysis of *in vivo* ABI5 protein levels in 35S:ABI5 and 35S:ABI5C153 seedlings. Actin protein levels were also determined as a loading control.

**d**, Seed-specific phenotypes of 35S:ABI5 and 35S:ABI5C153S lines. ABA-hypersensitive inhibition of germination and post-germinative growth in two 35S:ABI5 and 35S:ABI5C153S lines as compared to wild-type plants. Photographs show wild-type (Col-0) and two 35S:ABI5 and 35S:ABI5C153S independent lines (1, 2) in medium supplemented with 0.2  $\mu$ M ABA 4 days after sowing. Scale bars 1 mm.

**e**, Restoration of *abi5-1* mutation by both 35S:ABI5 and 35S:ABI5C153S constructs. ABA-hypersensitive inhibition of germination and seedling establishment in 35S:ABI5 and 35S:ABI5C153S lines compared to wild-type and *abi5-1* mutant plants.

Photographs show wild-type *abi5-1* and two *35S:ABI5* and *35S:ABI5C153S* independent lines (1, 2) in medium supplemented with 0.2  $\mu$ M ABA 4 days after sowing. Scale bars 1 mm.

**f**, NO-insensitivity during seedling establishment in *35S:ABI5C153S* lines as compared to *35S:ABI5* plants. NO donor and scavenger effect in seedling growth of wild-type (Col-0), *abi5-1*, *35S:ABI5* and *35S:ABI5C153S* lines grown for 3 days on MS agar plates untreated (Control), or supplemented with 300  $\mu$ M of the NO-donor SNAP and 100  $\mu$ M of the NO-scavenger cPTIO. Values represent the mean  $\pm$ SE ( $n=3$ ). Asterisks indicate significant differences compared with Control ( $t$ -test,  $*P<0.05$ ,  $**P<0.01$ ).

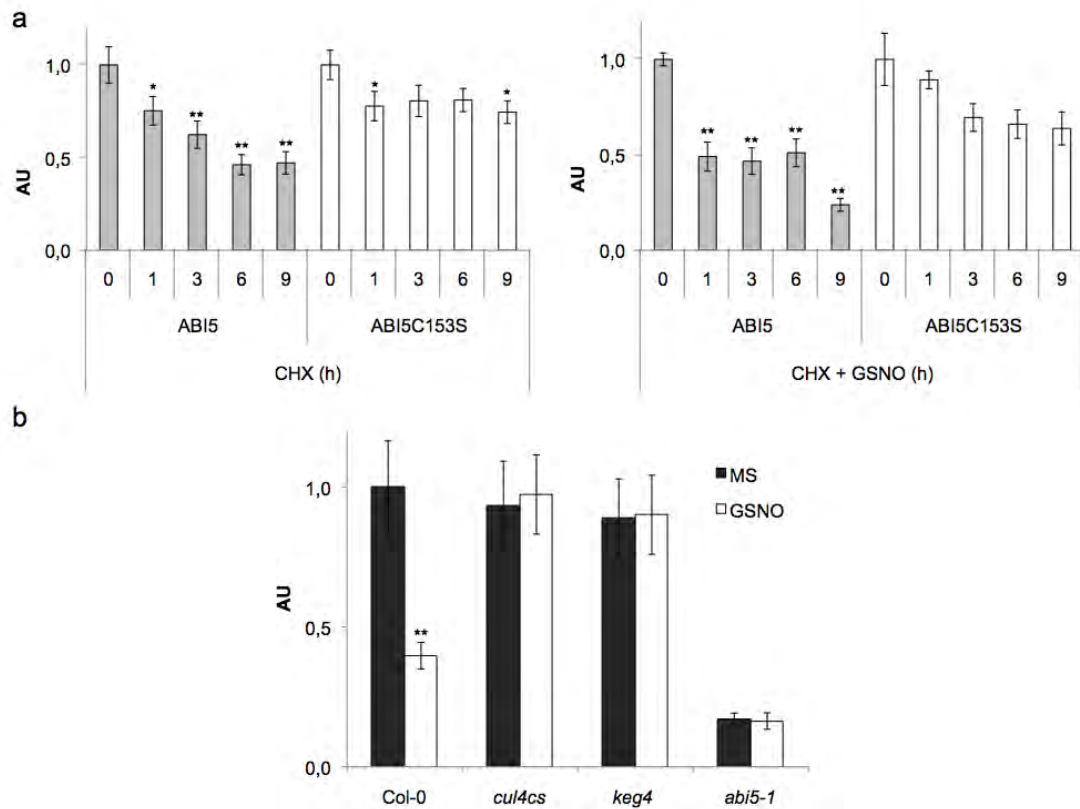

**Supplementary Figure 11. Quantitative data of NO-promoted ABI5 degradation.**

**a**, Quantitative data of immunoblot analysis of ABI5 (wild-type) and ABI5C153S (mutated version) degradation by application of GSNO (500  $\mu$ M) in the presence of cycloheximide (CHX, 1 mM). Values represent the mean  $\pm$ SE ( $n=3$ ) and normalized against actin, as shown in Fig. 4a. Asterisks indicate significant differences compared with 0 hours ( $t$ -test, \* $P<0.05$ , \*\* $P<0.01$ ).

**b**, Quantitative data of immunoblot analysis of CUL4 and KEG involvement in NO-promoted ABI5 degradation. Values represent the mean  $\pm$ SE ( $n=3$ ) and normalized against actin, as shown in Fig. 4b. Asterisks indicate significant differences compared with 0 hours ( $t$ -test, \* $P<0.05$ , \*\* $P<0.01$ ).

AU, arbitrary units.



## Supplementary References

1. Xue, Y., Liu, Z., Gao, X., Jin, C., Wen, L., Yao, X. & Ren, J. GPS-SNO: Computational prediction of protein S-nitrosylation sites with a modified GPS algorithm. *Plos One* **5**, e11290 (2010).
2. Lee, T.Y., Chen, Y.J., Lu, C.T., Ching, W.C., Teng, Y.C., Huang, H.D. & Chen, Y.J. dbSNO: a database of cysteine S-nitrosylation. *Bioinformatics* **28**, 2293-2295 (2012).
3. Zimmermann, P., Hirsch-Hoffmann, M., Henning, L. & Gruissem, W. GENEVESTIGATOR. Arabidopsis microarray database and analysis toolbox. *Plant Physiol.* **136**, 2621-2632 (2004).
